# Supplementary material for: Compromised fidelity of B‐cell tolerance checkpoints in AChR and MuSK myasthenia gravis
Source: PubMed Central journal article supplement — Ann Clin Transl Neurol. 2016 Apr 27;3(6):443–54. doi: 10.1002/acn3.311 (PMC4891998; doi:10.1002/acn3.311), 2016-04-27
Supplement: ACN3-3-443-s002.pdf [file ACN3-3-443-s002.pdf]

## Supplemental Tables

**Supplemental Table 1: Single cell PCR efficiency.**

|                     | MG-AChR-1 |     | MG-AChR-2 |     | MG-AChR-3 |     | MG-MuSK-1 |     | MG-MuSK-2 |     | HD-1 |     | HD-2 |     |
|---------------------|-----------|-----|-----------|-----|-----------|-----|-----------|-----|-----------|-----|------|-----|------|-----|
|                     | 10+       | 10- | 10+       | 10- | 10+       | 10- | 10+       | 10- | 10+       | 10- | 10+  | 10- | 10+  | 10- |
| <b>Sorted cells</b> | 96        | 96  | 96        | 96  | 96        | 96  | 48        | 48  | 48        | 48  | 144  | 304 | 96   | 144 |
| <b>Amplified VH</b> | 80        | 50  | 67        | 54  | 54        | 43  | 40        | 41  | 34        | 37  | 46   | 79  | 56   | 42  |
| <b>Amplified VL</b> | 65        | 57  | 99        | 88  | 67        | 52  | 39        | 36  | 36        | 37  | 43   | 45  | 47   | 33  |
| <b>Sequenced VH</b> | 39        | 29  | 55        | 39  | 47        | 38  | 24        | 27  | 24        | 27  | 18   | 21  | 31   | 21  |
| <b>Sequenced VL</b> | 32        | 26  | 48        | 35  | 41        | 33  | 19        | 22  | 19        | 22  | 18   | 21  | 31   | 21  |

New emigrant B cells are identified as 10+, referring to their expression of CD10. Mature naive B cells are identified as 10-, referring to their lack of CD10 expression. Amplified VH and VL refer to the quantity of single sorted cells for which a detectable (by gel electrophoresis) VH or VL PCR product was generated (The VL count includes both kappa and lambda for instances for which both products were found). Sequenced VH and VL refer to the number of PCR amplified VH and VLs for which complete sequences were generated. For MG-AChR-3, HD-1 and HD-2 only the light chains that had a successfully amplified matching heavy chain were subsequently amplified and sequenced. All matched VH and VLs were selected for expression of recombinant IgG. Sequence data that revealed stop codons, reading frame shifts or harbored greater than 3 replacement mutations or a single replacement mutation in the CDR3 were discarded from the recombinant IgG expression pipeline. B cells that yielded both a kappa and lambda light chain were both expressed, and then tested on the ELISAs (these clones are indicated on Supplemental Table 2 *below*).

## Supplemental Table 2: Sequence and reactivity tables for the MG and HD study subjects.

Sequence and reactivity tables for new emigrant B cells, (CD10+), from subject MG-AChR-1

| Ig  | HEAVY |      |    |    |     | MG-AChR-1, 10+              |     |        |           | LIGHT |    |               |        |           | Reactivity |
|-----|-------|------|----|----|-----|-----------------------------|-----|--------|-----------|-------|----|---------------|--------|-----------|------------|
|     | VH    | D    | RF | JH | (-) | CDR3(aa)                    | (+) | Length | Mutations | Vκ    | Jκ | CDR3(aa)      | Length | Mutations | Poly       |
| H2  | 3-48  | 3-22 | 2  | 5  | 3   | CARDSYDSSGGYGFYNWFDPW       | 1   | 21     | 0         | 1-12  | 4  | CQQANSFPFTF   | 11     | 0         | -          |
| H8  | 3-23  | 1-26 | 3  | 6  | 2   | CAKGPESGSFPYYYYGMDVW        | 1   | 21     | 0         | 2-28  | 1  | CMQALQTPRTF   | 11     | 0         | +          |
| H9  | 3-21  | 6-6  | 2  | 4  | 2   | CARDIAARYFDYW               | 2   | 13     | 0         | 1-9   | 3  | CQQLNSYPRFTF  | 12     | 0         | -          |
| H18 | 3-33  | 2-15 | 2  | 5  | 1   | CARRGGYCSGGSCNHLPEW         | 3   | 19     | 0         | 1-12  | 4  | CQQANSFPHTF   | 11     | 0         | -          |
| H19 | 3-30  | 5-12 | 2  | 4  | 3   | CARDADSPRGYFDYW             | 2   | 15     | 0         | 3-11  | 4  | CQQRSNWPQLTF  | 12     | 0         | -          |
| H20 | 3-33  | 6-13 | 1  | 6  | 4   | CARDLSPEQYSSSWARDKYYYYGMDVW | 3   | 27     | 0         | 1-39  | 4  | CQQSYSTPLTF   | 11     | 0         | -          |
| H23 | 3-7   | 3-22 | 2  | 4  | 1   | CARMVTGSSGYTAPKDYW          | 2   | 19     | 0         | 3-11  | 4  | CQQRSNWPRELTF | 13     | 0         | -          |
| H30 | 3-66  | 4-11 | 2  | 5  | 4   | CARDQHDYSNYDAPRSRWFDPW      | 4   | 22     | 0         | 3-15  | 2  | CQQYNNWPRTF   | 11     | 0         | -          |
| H39 | 4-61  | 2-15 | 2  | 4  | 3   | CARGRPASVVGYSGGSCYPHEDYFDYW | 3   | 28     | 0         | 1-9   | 3  | CQQLNSYPRFTF  | 12     | 0         | -          |
| H43 | 4-59  | 4-17 | 2  | 3  | 5   | CAREGGDYVDDAFDIW            | 1   | 16     | 0         | 3-20  | 3  | CQQYGSSPFTF   | 11     | 0         | -          |
| H50 | 3-66  | 3-22 | 2  | 4  | 2   | CARCACGYYSQNYFDYW           | 1   | 18     | 0         | 3-11  | 2  | CQQRSNHTF     | 9      | 0         | +          |
| H53 | 3-30  | 2-8  | 2  | 4  | 3   | CARDADSPRGYFDYW             | 2   | 15     | 0         | 3-20  | 2  | CQQYGSSHELYTF | 13     | 0         | -          |
| H59 | 3-30  | 5-5  | 1  | 6  | 2   | CAKADTAMGNWRTSMDVW          | 2   | 18     | 0         | 1-5   | 2  | CQQYNSYSYTF   | 11     | 0         | -          |
| H70 | 3-66  | 2-8  | 2  | 1  | 0   | CARVGYPHPW                  | 2   | 11     | 0         | 1-5   | 1  | CQQLNSYPYTF   | 11     | 0         | +          |
| H86 | 3-21  | 2-15 | 2  | 4  | 1   | CARGSAGGYFDYW               | 1   | 13     | 0         | 3-20  | 3  | CQQYGSSPIFTF  | 12     | 0         | -          |
| H96 | 3-7   | 2-2  | 2  | 5  | 1   | CARVKGLGYCSSTSCYTTGYNWFDPW  | 2   | 26     | 0         | 1-8   | 1  | CQQYYSYPPTF   | 11     | 0         | +          |

|     | VH   | D    | RF | JH | (-) | CDR3(aa)              | (+) | Length | Mutations | Vλ   | Jλ | CDR3(aa)        | Length | Mutations | Poly |
|-----|------|------|----|----|-----|-----------------------|-----|--------|-----------|------|----|-----------------|--------|-----------|------|
| H5  | 4-30 | 2-15 | 2  | 5  | 2   | CARDAYCSGGSCYSGNWFDPW | 1   | 21     | 0         | 2-23 | 1  | CCSYAGSYVF      | 10     | 0         | -    |
| H33 | 3-30 | 3-16 | 3  | 4  | 1   | CAKPRIMITFGGAYYFDYW   | 2   | 19     | 0         | 2-14 | 1  | CSSYTSSSTLIF    | 12     | 0         | -    |
| H49 | 3-15 | 3-10 | 3  | 5  | 1   | CATGGGVFRFDPW         | 1   | 13     | 0         | 3-25 | 2  | CQSADSSGTYYVF   | 13     | 0         | -    |
| H55 | 1-18 | 3-10 | 2  | 4  | 1   | CARRSPYYGSGSFDYW      | 2   | 17     | 0         | 2-14 | 2  | CSSYTSSSTLGYVVF | 15     | 0         | +    |
| H57 | 3-30 | 5-12 | 2  | 4  | 3   | CAKDADSPRGYFDYW       | 2   | 15     | 0         | 2-14 | 2  | CSSYTSSSTLLF    | 12     | 0         | +    |
| H58 | 1-2  | 3-10 | 3  | 4  | 2   | CARGPRDRGDYW          | 3   | 12     | 0         | 2-14 | 2  | CSSYTSSSTPVVF   | 13     | 0         | +    |
| H61 | 4-30 | 4-17 | 3  | 4  | 1   | CALSAGGMTTIVDYW       | 0   | 15     | 0         | 3-1  | 2  | CQAWDSSVVF      | 10     | 0         | +    |
| H63 | 3-33 | 4-17 | 2  | 4  | 4   | CARECWAGDGDYACIDYW    | 1   | 18     | 0         | 2-14 | 2  | CSSYTSSSTLVF    | 12     | 0         | -    |
| H67 | 3-30 | 5-12 | 3  | 4  | 3   | CAKDRHSGYDHYKYYFDYW   | 5   | 18     | 1s CDR2   | 2-11 | 2  | CCSYAGSYTLVF    | 12     | 0         | -    |

RF : reading frame    - : non-reactive    + : reactive    \* : kappa<sup>+</sup> and lambda<sup>+</sup> (dual receptor), both were expressed and tested on ELISA, but only one receptor was plotted on graphed figures    FR : framework    CDR : complementarity determining    r : replacement mutation    s : silent mutation

Sequence and reactivity tables for mature naive B cells, (CD10-), from subject MG-AChR-1

| Ig  | HEAVY |      |    |    |     | MG-AChR-1, 10-           |     |        |           | LIGHT |    |              |        |           | Reactivity |      |
|-----|-------|------|----|----|-----|--------------------------|-----|--------|-----------|-------|----|--------------|--------|-----------|------------|------|
|     | VH    | D    | RF | JH | (-) | CDR3(aa)                 | (+) | Length | Mutations | Vκ    | Jκ | CDR3(aa)     | Length | Mutations | Poly       | Hep2 |
| H60 | 3-74  | 6-19 | 1  | 6  | 1   | CASGYSSGWPNNYYYYGMDVW    | 0   | 21     | 0         | 1-39  | 1  | CQQSYSTPRTF  | 11     | 0         | +          | +    |
| H62 | 3-30  | 3-10 | 2  | 5  | 1   | CAGSVRGPNSKGGWFDPW       | 2   | 18     | 0         | 1-39  | 3  | CQQSYSTPLFTF | 12     | 0         | +          | +    |
| H6  | 3-30  | 3-22 | 2  | 3  | 4   | CAKVLMEVIGYYDSSGYPDAFDIW | 1   | 24     | 0         | 1-39  | 4  | CQQSYSTPLTF  | 11     | 0         | -          | +    |
| H19 | 3-23  | 3-3  | 3  | 4  | 1   | CAKVRRGQRAIFGVGKYYFDYW   | 5   | 22     | 0         | 1-5   | 1  | CQQYNSYSHTF  | 11     | 0         | +          | +    |
| H22 | 3-7   | 3-9  | 3  | 4  | 1   | CAGSSGLVSFDYW            | 0   | 13     | 0         | 1-39  | 3  | CQQSYSTPFTF  | 11     | 0         | -          | -    |
| H30 | 3-53  | 3-3  | 2  | 6  | 3   | CARDRYDFWSGLVGMVDVW      | 2   | 18     | 0         | 1-39  | 2  | CQQSYSTPPNTF | 12     | 0         | -          | +    |
| H32 | 3-53  | 6-13 | 2  | 4  | 1   | CARVYGRGAAAGTIDYW        | 2   | 17     | 0         | 3-15  | 1  | CQQYNNWPWTF  | 11     | 0         | -          | +    |
| H45 | 3-23  | 1-20 | 2  | 6  | 4   | CAKQDMEGNQMDVW           | 1   | 15     | 0         | 1D-8  | 4  | CQQYYSFPLTF  | 11     | 0         | -          | -    |

|     | Vλ   | D    | RF | JH | (-) | CDR3(aa)                   | (+) | Length | Mutations | Vλ   | Jλ | CDR3(aa)        | Length | Mutations | Poly | HeP2 |
|-----|------|------|----|----|-----|----------------------------|-----|--------|-----------|------|----|-----------------|--------|-----------|------|------|
| H69 | 3-53 | 6-13 | 2  | 4  | 1   | CARGGPTSGIAAVDYW           | 1   | 16     | 0         | 2-14 | 2  | CSSYTSSSTLVF    | 12     | 0         | +    | +    |
| H71 | 5-51 | 5-5  | 3  | 4  | 1   | CARANGGYSYGWPYYFDYW        | 1   | 19     | 0         | 2-14 | 7  | CSSYTSSSTAVF    | 12     | 0         | -    | +    |
| H87 | 3-15 | 3-22 | 2  | 1  | 2   | CTTDQWPTYYYDSSGFQHW        | 1   | 19     | 0         | 3-21 | 3  | CQVWDSSTPSWVF   | 14     | 0         | -    | -    |
| H89 | 3-48 | 3-22 | 2  | 4  | 1   | CARGQGSYSSASSAVDYW         | 1   | 20     | 0         | 3-1  | 2  | CQAWDSSTVVF     | 11     | 0         | -    | -    |
| H5  | 4-31 | 2-21 | 2  | 1  | 2   | CARILAYCGGDCHEYFQHW        | 3   | 19     | 0         | 1-40 | 3  | CQSYDSSLGGSVF   | 13     | 0         | -    | -    |
| H12 | 4-31 | 2-15 | 2  | 4  | 1   | CARWGYCSGGSCRGDYW          | 2   | 17     | 0         | 1-36 | 2  | CAAWDDSLNGVVF   | 13     | 0         | -    | -    |
| H14 | 4-31 | 3-22 | 2  | 6  | 2   | CARGYDSSGYSSYYGMDVW        | 1   | 19     | 0         | 2-23 | 1  | CCSYAGSSTFNYYVF | 14     | 0         | -    | -    |
| H27 | 4-30 | 3-22 | 3  | 4  | 5   | CARAYRSPWDYYDSSGYDDGFDYW   | 2   | 26     | 0         | 1-44 | 3  | CAAWDDSLNGPVF   | 13     | 0         | -    | -    |
| H39 | 3-30 | 2-2  | 2  | 6  | 1   | CAKPAQYCSSTSCYHLKPYYYGMDVW | 3   | 27     | 0         | 2-14 | 2  | CSSYTSSSTKVF    | 12     | 0         | +    | +    |

RF : reading frame    - : non-reactive    + : reactive    \* : kappa<sup>+</sup> and lambda<sup>+</sup> (dual receptor), both were expressed and tested on ELISA, but only one receptor was plotted on graphed figures    FR : framework    CDR : complementarity determining    r : replacement mutation    s : silent mutation

Sequence and reactivity tables for new emigrant B cells, (CD10+), from subject MG-AChR-2

| Ig  | HEAVY |      |    |    |     | MG-AChR-2, 10+              |     |        |           |      | LIGHT |              |        |           |      | Reactivity |
|-----|-------|------|----|----|-----|-----------------------------|-----|--------|-----------|------|-------|--------------|--------|-----------|------|------------|
|     | VH    | D    | RF | JH | (-) | CDR3(aa)                    | (+) | Length | Mutations | Vκ   | Jκ    | CDR3(aa)     | Length | Mutations | Poly |            |
| H4  | 1-18  | 1-26 | 3  | 6  | 0   | CARSYSGPYGMDVW              | 0   | 10     | 0         | 1-39 | 1     | CQQSYSTPRTF  | 9      | 0         | -    |            |
| H7  | 4-59  | 2-2  | 2  | 5  | 1   | CARGGSSTSCYHGGQCANWFDPW     | 1   | 19     | 0         | 3-15 | 2     | CQQYNNWPYTF  | 9      | 0         | -    |            |
| H8  | 4-34  | 2-15 | 2  | 6  | 2   | CARASPPPLWDCSGGSCYSKGYGMDVW | 1   | 23     | 0         | 1-5  | 1     | CQQYNSYPWTF  | 9      | 0         | -    |            |
| H9  | 3-30  | 5-12 | 3  | 4  | 2   | CARDYDYW                    | 0   | 4      | 0         | 1-17 | 3     | CLQHNSYPFTF  | 9      | 0         | -    |            |
| H10 | 4-59  | 6-13 | 1  | 4  | 1   | CARLSGSSWYPYFDYW            | 0   | 13     | 0         | 3-15 | 2     | CQQYNNWPPYTF | 12     | 0         | -    |            |
| H12 | 3-23  | 3-9  | 2  | 4  | 2   | CAKSRGVYDILTGGGDIW          | 1   | 14     | 0         | 1-39 | 4     | CQQSYSTPLTF  | 9      | 0         | +    |            |
| H20 | 3-33  | 3-3  | 1  | 5  | 3   | CARDLDGINWFDPW              | 0   | 10     | 0         | 1-5  | 1     | CQQYNSYPTWTF | 10     | 0         | -    |            |
| H27 | 4-31  | 3-10 | 2  | 4  | 3   | CARDRPGPTMVRGVSDWGGYYFDYW   | 3   | 25     | 0         | 1-39 | 1     | CQQSYSTPVTF  | 9      | 0         | -    |            |
| H36 | 3-11  | 6-6  | 3  | 4  | 2   | CARDMVLGSSGSQNDYW           | 0   | 13     | 0         | 1-5  | 1     | CQQYNSYSRTF  | 9      | 0         | -    |            |
| H37 | 1-69  | 2-15 | 3  | 6  | 1   | CARVGGVVGARGGLYYYYGMDVW     | 1   | 19     | 0         | 1-39 | 3     | CQQSYSTPFTF  | 9      | 0         | +    |            |
| H38 | 4-39  | 2-8  | 1  | 5  | 3   | CARLREVKESGPGNWFDPW         | 2   | 15     | 0         | 3-11 | 4     | CQQRSNWPLTF  | 9      | 0         | -    |            |
| H42 | 4-59  | 6-19 | 2  | 3  | 1   | CARVQQWLAQWGAFDIW           | 0   | 13     | 0         | 1-8  | 1     | CQQYYSYPWTF  | 11     | 0         | +    |            |
| H22 | 3-64  | 1-26 | 2  | 4  | 3   | CARGGIEWELYNDYW             | 0   | 11     | 0         | 3-15 | 2     | CQQYNNWPPYTF | 11     | 0         | -    |            |
| H29 | 4-31  | 3-10 | 1  | 4  | 1   | CATGRKAGFFDYW               | 2   | 9      | 0         | 4-1  | 1     | CQQYSTLTWTF  | 11     | 0         | +    |            |
| H48 | 4-39  | 3-22 | 3  | 4  | 1   | CARHYSPMIVVINPFDYW          | 1   | 17     | 0         | 3-20 | 4     | CQQYGSPLAF   | 10     | 0         | +    |            |

|     | VH   | D    | RF | JH | (-) | CDR3(aa)                   | (+) | Length | Mutations | Vλ   | Jλ | CDR3(aa)       | Length | Mutations | Poly |
|-----|------|------|----|----|-----|----------------------------|-----|--------|-----------|------|----|----------------|--------|-----------|------|
| H5  | 3-30 | 6-6  | 1  | 6  | 2   | CARDRNLYSSSSAGYYYYGMDVW    | 1   | 20     | 0         | 3-1  | 3  | CQAWDSSTVVF    | 9      | 0         | -    |
| H13 | 3-30 | 6-13 | 2  | 3  | 2   | CARDRRAAAGTVRYAFDIW        | 3   | 15     | 0         | 2-23 | 2  | CCSYAGSSTVVF   | 10     | 0         | +    |
| H24 | 3-15 | 3-22 | 2  | 4  | 4   | CTTDGDYDSSGYYYGIPRNFYDW    | 1   | 23     | 0         | 1-51 | 3  | CGTWDSLSADVVF  | 12     | 0         | -    |
| H30 | 3-7  | 5-12 | 1  | 4  | 3   | CAREDIVATSADYW             | 0   | 10     | 0         | 1-44 | 3  | CAAWDDSLNGWVF  | 11     | 0         | -    |
| H31 | 4-4  | 3-10 | 2  | 2  | 2   | CARTYYYGSGSYEGALPRGHWFYDLW | 3   | 26     | 0         | 3-1  | 2  | CQAWDSSTAVF    | 11     | 0         | -    |
| H35 | 4-34 | 4-17 | 2  | 5  | 2   | CARGGSRGDYHNWFDPW          | 2   | 13     | 0         | 1-51 | 3  | CGTWDSLSAVVF   | 11     | 0         | -    |
| H45 | 4-39 | 3-10 | 1  | 4  | 2   | CARRLWFGELLYYYLDYW         | 2   | 15     | 0         | 3-1  | 3  | CQAWDSTVVF     | 8      | 0         | +    |
| H46 | 4-39 | 6-13 | 2  | 4  | 1   | CARLVAAAGTLNFDYW           | 0   | 12     | 0         | 3-25 | 3  | CQSADSSGTLVF   | 10     | 0         | -    |
| H48 | 3-30 | 2-15 | 2  | 4  | 2   | CARAESCSCYSPVFDYW          | 0   | 14     | 0         | 3-21 | 3  | CQVWDSSTHVVVF  | 11     | 0         | -    |
| H7  | 4-39 | 3-9  | 3  | 3  | 4   | CARWVYDIEHNPDADFIDW        | 1   | 14     | 0         | 1-51 | 2  | CGTWDSLSAVVF   | 13     | 0         | -    |
| H28 | 4-4  | 3-10 | 2  | 4  | 1   | CARVRGGYSGSSSDYW           | 1   | 13     | 0         | 1-47 | 3  | CAAWDDSLSGRGF  | 13     | 0         | -    |
| H31 | 4-30 | 2-15 | 3  | 2  | 3   | CARSFGGDDVVVAASRWYFDLW     | 1   | 19     | 0         | 2-14 | 2  | CSSYTSSTLVF    | 12     | 0         | -    |
| H35 | 3-40 | 3-22 | 2  | 4  | 2   | CARNHRGRTYYYDSSGYLPDYW     | 3   | 18     | 0         | 1-44 | 2  | CAAWDDSLNGPVVF | 14     | 0         | -    |
| H36 | 3-30 | 3-10 | 2  | 5  | 2   | CARDQAYYSGSYGTDFDPW        | 0   | 16     | 0         | 1-51 | 3  | CGTWDSLSAGVF   | 13     | 0         | -    |
| H43 | 3-53 | 6-25 | 2  | 4  | 4   | CASGGGIAAAEGDEFDYW         | 0   | 14     | 0         | 3-1  | 3  | CQAWDSSTAWF    | 11     | 0         | -    |

RF : reading frame - : non-reactive + : reactive \* : kappa<sup>+</sup> and lambda<sup>+</sup> (dual receptor), both were expressed and tested on ELISA, but only one receptor was plotted on graphed figures FR : framework CDR : complementarity determining r : replacement mutation s : silent mutation

Sequence and reactivity tables for mature naive B cells, (CD10-), from subject MG-AChR-2

| Ig   | HEAVY |      |    |    |     |                       | MG-AChR-2, 10- |        |           |                | LIGHT          |               |        |           |      | Reactivity |  |
|------|-------|------|----|----|-----|-----------------------|----------------|--------|-----------|----------------|----------------|---------------|--------|-----------|------|------------|--|
|      | VH    | D    | RF | JH | (-) | CDR3(aa)              | (+)            | Length | Mutations | V <sub>κ</sub> | J <sub>κ</sub> | CDR3(aa)      | Length | Mutations | Poly | Hep2       |  |
| H49  | 3-30  | 3-22 | 3  | 4  | 2   | CARDITMIVVPGDYW       | 0              | 11     | 0         | 4-1            | 1              | CQQYYSTPWTF   | 11     | 0         | +    | +          |  |
| H52  | 3-30  | 2-2  | 3  | 4  | 1   | CATSNPPVPAQYYFDYW     | 0              | 15     | 0         | 3-20           | 2              | CQQYGSSPPVYTF | 13     | 0         | -    | -          |  |
| H54* | 4-59  | 1-26 | 3  | 4  | 2   | CARDLSGSYHFDYW        | 1              | 10     | 0         | 1-12           | 3              | CQQANSFPFSF   | 11     | 0         | -    | +          |  |
| H55  | 1-2   | 6-19 | 1  | 4  | 0   | CARRHSSGWRGLNYW       | 3              | 11     | 0         | 1-17           | 4              | CLQHNSYPFSF   | 11     | 0         | +    | -          |  |
| H70  | 5-1   | 6-13 | 1  | 4  | 1   | CASPGYSSSWYDYW        | 0              | 10     | 0         | 3-15           | 1              | CQQYNNWPRTF   | 11     | 0         | +    | +          |  |
| H75  | 3-7   | 5-5  | 3  | 4  | 1   | CATFRGYSYGFNDYW       | 1              | 11     | 0         | 2-28           | 3              | CQQYGSSSYTF   | 11     | 0         | -    | -          |  |
| H77  | 1-58  | 3-22 | 2  | 4  | 3   | CAAFNHDIYDSSGYQPHFDYW | 2              | 20     | 0         | 3-20           | 2              | CQQYGSSSYTF   | 11     | 0         | -    | -          |  |
| H89  | 3-23  | 6-13 | 3  | 4  | 1   | CAKVQQLGPFDYW         | 0              | 9      | 0         | 1-5            | 1              | CQQYNSYWTF    | 10     | 0         | -    | +          |  |
| H92  | 3-48  | 4-17 | 2  | 1  | 2   | CARGKADYGDYVRYFQHW    | 3              | 14     | 0         | 1-5            | 4              | CQQYNSYSSTF   | 11     | 0         | -    | +          |  |
| H56  | 3-64  | 3-22 | 2  | 4  | 3   | CVKSPLVGYDSSGYEDYW    | 0              | 15     | 0         | 1-39           | 3              | CQQSYSTLTF    | 10     | 0         | -    | +          |  |
| H62  | 4-31  | 5-19 | 1  | 6  | 2   | CARDRHGGSSGPKSQVGFDPW | 3              | 17     | 0         | 1-33           | 1              | CQQYDNLPRTF   | 11     | 0         | -    | +          |  |
| H66  | 3-30  | 3-9  | 2  | 4  | 2   | CAKQIYDILTYSPFDYW     | 1              | 14     | 0         | 2-28           | 4              | CMQALQTPPTF   | 11     | 0         | -    | -          |  |
| H74  | 3-23  | 3-10 | 1  | 1  | 1   | CAKGVLLWFGELLGGFQHW   | 5              | 15     | 0         | 1-33           | 3              | CQQYDNLPTF    | 11     | 0         | +    | -          |  |

|      | VH   | D    | RF | JH | (-) | CDR3(aa)                    | (+) | Length | Mutations | V <sub>λ</sub> | J <sub>λ</sub> | CDR3(aa)      | Length | Mutations | Poly | HeP2 |
|------|------|------|----|----|-----|-----------------------------|-----|--------|-----------|----------------|----------------|---------------|--------|-----------|------|------|
| H50  | 4-30 | 3-3  | 3  | 5  | 1   | CARGVHGPPERRITIFAKGVPPSYRPW | 5   | 23     | 0         | 1-36           | 7              | CAAWDDSLNGPVF | 11     | 0         | +    | +    |
| H54* | 4-59 | 1-26 | 3  | 4  | 2   | CARDLSGSYHFDYW              | 1   | 10     | 0         | 1-12           | 1              | CQQANSFPFSF   | 11     | 0         | -    | +    |
| H63  | 4-59 | 6-19 | 1  | 2  | 2   | CARDQVASRFDLW               | 1   | 9      | 0         | 1-44           | 3              | CAAWDDSLNGPVF | 11     | 0         | -    | -    |
| H87  | 1-18 | 3-10 | 2  | 5  | 2   | CARVPPGDYGGSSIRFDPW         | 1   | 16     | 0         | 1-47           | 3              | CAAWDDSLSGVVF | 11     | 0         | -    | -    |
| H95  | 3-23 | 1-17 | 3  | 4  | 2   | CAKGDRWNYVSVPTTNDYW         | 1   | 15     | 0         | 2-14           | 3              | CSSYTSSSVVF   | 9      | 0         | +    | -    |
| H76  | 3-30 | 3-9  | 2  | 4  | 2   | CARAGLYDILTYFDYW            | 0   | 12     | 0         | 3-21           | 2              | CQVWDSSSHVVVF | 13     | 0         | -    | -    |
| H77  | 1-2  | 6-19 | 2  | 4  | 2   | CARDIAVAGLFDYW              | 0   | 10     | 0         | 1-44           | 3              | CAAWDDSLNGPVF | 13     | 0         | -    | -    |
| H78  | 3-21 | 2-15 | 2  | 3  | 2   | CARESGYCSCSYSGTAFDIW        | 0   | 18     | 0         | 2-8            | 1              | CSSYAGSNNYVF  | 12     | 0         | -    | -    |

RF : reading frame    - : non-reactive    + : reactive    \* : kappa<sup>+</sup> and lambda<sup>+</sup> (dual receptor), both were expressed and tested on ELISA, but only one receptor was plotted on graphed figures    FR : framework    CDR : complementarity determining    r : replacement mutation    s : silent mutation

Sequence and reactivity tables for new emigrant B cells, (CD10+), from subject MG-AChR-3

| Ig   | HEAVY |      |    |    |     | MG-AChR-3, 10+          |     |        |           |                | LIGHT          |               |        |                 |      | Reactivity |  |
|------|-------|------|----|----|-----|-------------------------|-----|--------|-----------|----------------|----------------|---------------|--------|-----------------|------|------------|--|
|      | VH    | D    | RF | JH | (-) | CDR3(aa)                | (+) | Length | Mutations | V <sub>K</sub> | J <sub>K</sub> | CDR3(aa)      | Length | Mutations       | Poly |            |  |
| H18  | 3-23  | 1-26 | 3  | 4  | 1   | CATDRGSYW               | 1   | 9      | 0         | 1-5            | 2              | CQQYNSYSQTF   | 11     | 0               | +    |            |  |
| H26  | 4-34  | 6-6  | 2  | 4  | 1   | CARIKSSIAARNFDYW        | 3   | 16     | 0         | 3-20           | 2              | CQQYGSSQYTF   | 11     | 0               | -    |            |  |
| H27* | 4-59  | 6-19 | 2  | 2  | 2   | CARAMGAVAGMRDYSFDYW     | 2   | 19     | 0         | 3-15           | 3              | CQQYNNWPPEFTF | 13     | 0               | -    |            |  |
| H31  | 1-69  | 3-22 | 2  | 3  | 3   | CARTVRRYDSSEYAFDIW      | 3   | 18     | 0         | 3-11           | 4              | CQQRNSLTF     | 10     | 0               | -    |            |  |
| H39* | 3-23  | 3-10 | 2  | 4  | 2   | CAKDQSNYYDPVSHW         | 2   | 15     | 0         | 4-1            | 4              | CQQYYSTPLTF   | 11     | 1s FR3/ 1s CDR3 | -    |            |  |
| H4   | 4-31  | 3-16 | 2  | 4  | 1   | CARDRFGSGSYGYW          | 2   | 15     | 0         | 3-11           | 3              | CQQRSTLTF     | 10     | 0               | -    |            |  |
| H6*  | 4-31  | 3-10 | 3  | 4  | 1   | CARLVMVRGVIISRFDYW      | 3   | 18     | 0         | 3-11           | 1              | CQQRSNWPPWTF  | 12     | 0               | +    |            |  |
| H20  | 3-11  | 3-22 | 2  | 4  | 3   | CASGPYYDSSGYEFPDYW      | 0   | 19     | 1r Fr2    | 1-39           | 4              | CQQSYSTPPLTF  | 12     | 0               | -    |            |  |
| H21  | 4-30  | 1-26 | 1  | 4  | 1   | CARGVVGATKGGYFDYW       | 2   | 17     | 0         | 1-39           | 1              | CQQSYSTPRTF   | 11     | 0               | -    |            |  |
| H39  | 3-7   | 2-21 | 3  | 4  | 2   | CAREGRTLVTATPSDYW       | 2   | 18     | 0         | 3-20           | 2              | CQQYGSSPYTF   | 11     | 0               | -    |            |  |
| H41  | 1-3   | 3-22 | 2  | 6  | 2   | CAMSYYYDSSGRGKPYYYGMDVW | 2   | 23     | 0         | 2-28           | 2              | CMQALQTPYTF   | 11     | 0               | -    |            |  |

| Ig   | VH   | D    | RF | JH | (-) | HEAVY                   |     |        |           | LIGHT          |                | Poly           |    |                |   |
|------|------|------|----|----|-----|-------------------------|-----|--------|-----------|----------------|----------------|----------------|----|----------------|---|
|      |      |      |    |    |     | CDR3(aa)                | (+) | Length | Mutations | V <sub>L</sub> | J <sub>L</sub> |                |    |                |   |
| H15  | 4-31 | 3-22 | 2  | 2  | 4   | CARDSKKDYDSSGHPKPWFYDLW | 5   | 24     | 0         | 3-21           | 3              | CQVWDDSSDPQGVF | 14 | 0              | - |
| H27* | 4-59 | 6-19 | 2  | 2  | 2   | CARAMGAVAGMRDYSFDYW     | 2   | 19     | 0         | 3-1            | 2              | CQAWDSSPYVVF   | 12 | 0              | - |
| H33  | 4-61 | 1-7  | 1  | 4  | 1   | CARGGITGTTFFVDYW        | 2   | 16     | 0         | 1-44           | 2              | CAAWDDSLKAVF   | 12 | 0              | - |
| H35  | 1-69 | 3-3  | 2  | 4  | 3   | CARDRERWNFDYW           | 3   | 13     | 0         | 2-14           | 3              | CSSYTSSSTRVVF  | 12 | 1r FR3         | + |
| H39* | 3-23 | 3-10 | 2  | 4  | 2   | CAKDQSNYYDPVSHW         | 2   | 15     | 0         | 1-47           | 3              | CAAWDDSLSGRFF  | 13 | 0              | - |
| H40  | 4-31 | 5-18 | 3  | 6  | 1   | CARGGYSYGTYYYYGMDVW     | 1   | 19     | 0         | 2-8            | 2              | CSSYAGSNNLVF   | 12 | 0              | - |
| H47  | 4-34 | 4-23 | 3  | 4  | 1   | CARGVATPGDYW            | 1   | 12     | 0         | 2-14           | 2              | CSSYTSSSTLVF   | 12 | 1r FR3         | - |
| H1   | 1-3  | 3-10 | 1  | 4  | 2   | CVPELWYGAHYFDYW         | 1   | 15     | 0         | 2-14           | 1              | CSSYTSSSTPYVF  | 13 | 1r FR3         | + |
| H6*  | 4-31 | 3-10 | 3  | 4  | 1   | CARLVMVRGVIISRFDYW      | 3   | 18     | 0         | 2-14           | 2              | CSSYTSSSTPYVF  | 13 | 1r FR3         | + |
| H9   | 3-15 | 5-18 | 3  | 6  | 1   | CTTVYSNYYGMDVW          | 0   | 15     | 0         | 7-46           | 1              | CLLSYSGAHYVF   | 12 | 0              | - |
| H13  | 3-30 | 3-10 | 1  | 4  | 3   | CAKDRSWGGLDYW           | 2   | 14     | 0         | 3-25           | 1              | CQSADSSGTYVF   | 12 | 0              | - |
| H15  | 1-2  | 6-13 | 1  | 6  | 2   | CARDQPIYGRYSSSWYYYGMDVW | 2   | 23     | 0         | 1-44           | 2              | CAAWDDSLNVVF   | 12 | 0              | - |
| H17  | 3-66 | 1-26 | 1  | 4  | 1   | CARGFIGGFYDW            | 1   | 12     | 0         | 2-14           | 2              | CSSYTSSSTPYVVF | 14 | 1r CDR2/1r FR3 | - |
| H19  | 1-18 | 3-10 | 1  | 1  | 1   | CARTVLLWFGVGSHPDPW      | 2   | 18     | 0         | 2-11           | 1              | CCSYAGSYTPLVF  | 13 | 0              | + |
| H37  | 3-21 | 5-12 | 3  | 6  | 1   | CARIGGYAYYYYGMDVW       | 1   | 17     | 0         | 1-51           | 3              | CGTWDDSSLSAGVF | 13 | 0              | - |

RF : reading frame - : non-reactive + : reactive \* : kappa<sup>+</sup> and lambda<sup>+</sup> (dual receptor), both were expressed and tested on ELISA, but only one receptor was plotted on graphed figures FR : framework CDR : complementarity determining r : replacement mutation s : silent mutation

Sequence and reactivity tables for mature naive B cells, (CD10-), from subject MG-AChR-3

| Ig   | HEAVY |      |    |    |     | MG-AChR-3, 10-          |     |        |                | LIGHT          |                |              |        | Reactivity |      |      |
|------|-------|------|----|----|-----|-------------------------|-----|--------|----------------|----------------|----------------|--------------|--------|------------|------|------|
|      | VH    | D    | RF | JH | (-) | CDR3(aa)                | (+) | Length | Mutations      | V <sub>K</sub> | J <sub>K</sub> | CDR3(aa)     | Length | Mutations  | Poly | Hep2 |
| H58  | 3-23  | 6-19 | 2  | 1  | 1   | CAKESGVIAVAGTSGYW       | 1   | 17     | 0              | 3-11           | 1              | CQQRSNWPPWTF | 12     | 0          | +    | +    |
| H59* | 3-23  | 4-23 | 3  | 4  | 3   | CAKAPGVTPEDFFDYW        | 1   | 16     | 0              | 3-20           | 1              | CQQYGSSPRTF  | 11     | 0          | -    | -    |
| H64  | 1-69  | 1-20 | 3  | 5  | 3   | CARDTDNWNPNPGKNWFDPW    | 2   | 19     | 0              | 3-11           | 2              | CQQRSNWPPYTF | 12     | 0          | +    | -    |
| H72  | 5-51  | 5-12 | 3  | 4  | 2   | CARLDGGPMDYW            | 1   | 12     | 0              | 1-27           | 1              | CQKYNSAPRTF  | 11     | 0          | -    | +    |
| H75  | 4-34  | 3-16 | 2  | 4  | 2   | CARYSRAPYDYVWGSYRYSFDYW | 3   | 23     | 0              | 4-1            | 4              | CQQYYSTPPLTF | 12     | 0          | +    | -    |
| H87* | 4-4   | 1-26 | 1  | 4  | 1   | CARGAILGIFYW            | 1   | 13     | 0              | 1-33           | 4              | CQQYDNLPRTF  | 11     | 0          | -    | +    |
| H89  | 3-21  | 2-2  | 3  | 4  | 3   | CAREGEKSVVPAARTRDYW     | 4   | 19     | 0              | 1-16           | 2              | CQQYNSYPLTF  | 11     | 0          | +    | +    |
| H61  | 1-46  | 1-7  | 2  | 4  | 2   | CARARWNYKDFDYW          | 3   | 14     | 1r CDR1/2r FR3 | 1-39           | 3              | CQQSYSTPLTF  | 11     | 0          | -    | +    |
| H62  | 1-18  | 2-21 | 1  | 4  | 3   | CARDYQLYCGGDCYYDYW      | 1   | 18     | 0              | 3-15           | 2              | CQQYNNWPRTF  | 11     | 0          | -    | -    |

|      | VH   | D    | RF | JH | (-) | CDR3(aa)                 | (+) | Length | Mutations | V <sub>λ</sub> | J <sub>λ</sub> | CDR3(aa)       | Length | Mutations | Poly | HeP2 |
|------|------|------|----|----|-----|--------------------------|-----|--------|-----------|----------------|----------------|----------------|--------|-----------|------|------|
| H59* | 3-23 | 4-23 | 3  | 4  | 3   | CAKAPGVTPEDFFDYW         | 1   | 16     | 0         | 1-40           | 1              | CQSYDSSLGYSYVF | 13     | 0         | -    | -    |
| H65  | 1-69 | 3-22 | 2  | 6  | 2   | CASPYTLTDSSGYPSSPLYGMDVW | 0   | 24     | 0         | 3-21           | 3              | CQVWDSSSDHWVF  | 13     | 0         | +    | +    |
| H71  | 5-51 | 3-10 | 2  | 4  | 3   | CARRGRSWELWGDPFDYW       | 3   | 18     | 0         | 1-44           | 2              | CAAWDDSLNGPVF  | 13     | 0         | -    | -    |
| H87* | 4-4  | 1-26 | 1  | 4  | 1   | CARGAILGIFYW             | 1   | 13     | 0         | 1-40           | 3              | CQSYDSSLRVF    | 11     | 0         | -    | +    |
| H94  | 4-30 | 3-10 | 1  | 4  | 3   | CAREGGLLWFGERYFDYW       | 2   | 19     | 0         | 1-44           | 3              | CAAWDDSLNGYWVF | 14     | 0         | +    | +    |
| H65  | 4-30 | 3-10 | 2  | 5  | 1   | CARNYGSGSRNWFDPW         | 2   | 16     | 0         | 1-40           | 3              | CQSYDSSLGYSYVF | 12     | 0         | -    | +    |
| H93  | 4-34 | 5-18 | 3  | 5  | 1   | CARLGYRPPTVGFDPW         | 2   | 16     | 0         | 2-14           | 3              | CSSYSSSTRVF    | 12     | 1r FR3    | -    | +    |

RF : reading frame    - : non-reactive    + : reactive    \* : kappa<sup>+</sup> and lambda<sup>+</sup> (dual receptor), both were expressed and tested on ELISA, but only one receptor was plotted on graphed figures    FR : framework    CDR : complementarity determining    r : replacement mutation    s: silent mutation

Sequence and reactivity tables for new emigrant B cells, (CD10+), from subject MG-MuSK-1

| Ig   | HEAVY |      |    |    |     | MG-MuSK-1, 10+           |     |        |           | LIGHT          |                |              |        |           | Reactivity |
|------|-------|------|----|----|-----|--------------------------|-----|--------|-----------|----------------|----------------|--------------|--------|-----------|------------|
|      | VH    | D    | RF | JH | (-) | CDR3(aa)                 | (+) | Length | Mutations | V <sub>κ</sub> | J <sub>κ</sub> | CDR3(aa)     | Length | Mutations | Poly       |
| H56* | 3-30  | 3-10 | 3  | 4  | 3   | CARARGVRGVIGYFDYW        | 0   | 17     | 0         | 3-20           | 4              | CQQYGSSPRITF | 12     | 0         | -          |
| H58  | 4-30  | 3-10 | 2  | 5  | 2   | CARGRPLLAYGSGSYMPNWFDPW  | 0   | 24     | 0         | 4-1            | 4              | CQQYYSTPLTF  | 11     | 0         | +          |
| H59  | 3-33  | 6-19 | 2  | 4  | 3   | CAREQIAVAATRGRNYFDYW     | 0   | 20     | 0         | 1-39           | 1              | CQQSYSTPTWTF | 12     | 0         | +          |
| H60  | 4-61  | 5-5  | 3  | 4  | 1   | CARGGGGYSYGWESSHEEHFDYW  | 0   | 23     | 0         | 1-5            | 1              | CQQYNSYRTF   | 10     | 0         | +          |
| H61  | 4-61  | 3-10 | 3  | 4  | 1   | CARGNKGTFDYW             | 1   | 12     | 0         | 1-39           | 1              | CQQSYSTPRTF  | 11     | 0         | +          |
| H62  | 4-59  | 6-13 | 1  | 2  | 1   | CARGYSSSYLLYWYFDLW       | 0   | 18     | 0         | 4-1            | 1              | CQQYYSTPLTF  | 11     | 0         | +          |
| H69  | 1-3   | 3-10 | 3  | 5  | 2   | CARGPMVRGVPSDIIPW        | 0   | 17     | 0         | 3-20           | 1              | CQQYGSSPGTF  | 11     | 0         | +          |
| H72* | 4-34  | 5-12 | 3  | 4  | 3   | CARGWADRRYSGYDWQPGYYFDYW | 0   | 24     | 0         | 4-1            | 1              | CQQYYSTPQTF  | 11     | 0         | -          |
| H73  | 3-23  | 3-22 | 2  | 4  | 0   | CAKSPYYYDSSGYPVYFDYW     | 1   | 20     | 0         | 3-20           | 3              | CQQYGSSPFTF  | 11     | 0         | -          |
| H75  | 3-30  | 2-15 | 2  | 4  | 1   | CARSQSSGKHWPDYW          | 1   | 16     | 0         | 1-9            | 1              | CQQLNSYPRTF  | 11     | 0         | +          |
| H80  | 3-23  | 1-26 | 3  | 4  | 1   | CAKRGSGSYEGFVDYW         | 1   | 17     | 0         | 4-1            | 2              | CQQYYSTPCSF  | 11     | 0         | +          |
| H89  | 4-34  | 1-14 | 3  | 4  | 1   | CARVRIHYFDYW             | 0   | 12     | 0         | 1-39           | 4              | CQQSYSTPLTF  | 11     | 0         | -          |
| H90  | 3-9   | 3-16 | 2  | 6  | 1   | CAKDAPRGDYARGYYYYGMDVW   | 0   | 22     | 0         | 3-20           | 1              | CQQYGSSF     | 8      | 0         | -          |
| H91  | 4-34  | 6-13 | 2  | 4  | 3   | CASSRIAAGSQDYW           | 0   | 15     | 0         | 1-39           | 1              | CQQSYSTPLTF  | 11     | 0         | -          |
| H95  | 3-11  | 3-22 | 1  | 4  | 3   | CARDKHYYDSSGVYSYW        | 0   | 17     | 0         | 1-9            | 2              | CQQLNSYPPYTF | 12     | 0         | -          |

|      | VH   | D    | RF | JH | (-) | CDR3(aa)                 | (+) | Length | Mutations | V <sub>λ</sub> | J <sub>λ</sub> | CDR3(aa)       | Length | Mutations | Poly |
|------|------|------|----|----|-----|--------------------------|-----|--------|-----------|----------------|----------------|----------------|--------|-----------|------|
| H54  | 1-2  | 5-5  | 3  | 4  | 1   | CAGSRGYSYGPFYDW          | 1   | 15     | 0         | 2-23           | 3              | CCSYAGSSTMVF   | 12     | 0         | -    |
| H56* | 3-30 | 3-10 | 3  | 4  | 1   | CARARGVRGVIGYFDYW        | 3   | 17     | 0         | 1-40           | 2              | CQSYDSSLGWDVVF | 17     | 0         | -    |
| H72* | 4-34 | 5-12 | 3  | 4  | 3   | CARGWADRRYSGYDWQPGYYFDYW | 3   | 24     | 0         | 2-11           | 2              | CCSYAGSYTLVF   | 12     | 0         | -    |

RF : reading frame - : non-reactive + : reactive \* : kappa<sup>+</sup> and lambda<sup>+</sup> (dual receptor), both were expressed and tested on ELISA, but only one receptor was plotted on graphed figures FR : framework CDR : complementarity determining r : replacement mutation s : silent mutation



Sequence and reactivity tables for mature naive B cells, (CD10-), from subject MG-MuSK-1

| Ig   | HEAVY |      |    |    |     | MG-MuSK-1, 10-          |     |        |           | LIGHT          |                |               |        | Reactivity |      |      |
|------|-------|------|----|----|-----|-------------------------|-----|--------|-----------|----------------|----------------|---------------|--------|------------|------|------|
|      | VH    | D    | RF | JH | (-) | CDR3(aa)                | (+) | Length | Mutations | V <sub>κ</sub> | J <sub>κ</sub> | CDR3(aa)      | Length | Mutations  | Poly | Hep2 |
| H3   | 1-69  | 5-12 | 3  | 4  | 3   | CARAREGYSGYDPLTGGGYFDYW | 2   | 23     | 0         | 3-11           | 2              | CQQRSNWPPMYTF | 13     | 0          | -    | -    |
| H6   | 3-11  | 5-5  | 2  | 4  | 3   | CARDLDPGIQLWPGGDYD      | 1   | 18     | 0         | 1-39           | 1              | CQQSYSTPETF   | 11     | 0          | -    | +    |
| H7   | 3-33  | 3-3  | 2  | 3  | 2   | CARGGSGYYLDAFDIW        | 1   | 16     | 0         | 1-12           | 4              | CQQANSFPHTF   | 11     | 0          | -    | -    |
| H8   | 1-69  | 6-19 | 2  | 5  | 2   | CARERRTGIPDPW           | 3   | 13     | 0         | 3-11           | 1              | CQQRINWWTF    | 10     | 0          | -    | -    |
| H10* | 1-3   | 3-22 | 2  | 4  | 1   | CARVSANYDSSGYFFGHW      | 2   | 19     | 0         | 3-20           | 3              | CQQYGSSFTF    | 10     | 0          | -    | +    |
| H14  | 3-21  | 5-24 | 2  | 3  | 5   | CARDGDLDRPNSSGDAFDIW    | 2   | 20     | 0         | 1D-33          | 1              | CQQYDNLPPTF   | 11     | 0          | -    | -    |
| H19  | 3-23  | 3-10 | 2  | 4  | 3   | CAKDCRRDYGGSGSFASDYW    | 3   | 22     | 0         | 3-15           | 1              | CQQYNNWPLF    | 10     | 0          | +    | +    |
| H24  | 3-48  | 3-10 | 1  | 6  | 1   | CATLGGPGMDVW            | 0   | 12     | 0         | 3-20           | 1              | CQQYGSSPDTF   | 11     | 0          | -    | -    |
| H26  | 4-31  | 6-19 | 1  | 3  | 3   | CARDLGYSSGWYKEDIW       | 2   | 18     | 0         | 3-11           | 1              | CQQRSNWPVAF   | 11     | 0          | -    | +    |
| H27  | 4-30  | 3-10 | 3  | 3  | 1   | CARGLPMVLGVITLYAFDIC    | 1   | 20     | 0         | 1-39           | 4              | CQQSYSTGRF    | 10     | 0          | +    | +    |
| H30  | 3-7   | 3-3  | 2  | 4  | 3   | CARSRNDPWYDFWSGYQYFDYW  | 2   | 24     | 0         | 1-5            | 1              | CQQYNSYRWTF   | 11     | 0          | +    | +    |
| H35  | 1-2   | 2-21 | 2  | 4  | 3   | CARDPGAYCGGDCYSSGGIDYW  | 1   | 21     | 0         | 1-9            | 2              | CQQLNSYPYTF   | 11     | 0          | -    | +    |
| H39  | 1-69  | 3-22 | 2  | 5  | 2   | CASISYYDSSGYSNWFDPW     | 0   | 19     | 0         | 3-20           | 1              | CQQYGSSPWTF   | 11     | 0          | +    | -    |
| H43  | 4-39  | 3-9  | 2  | 3  | 2   | CASAYYDILTYGRTKHAFDIW   | 3   | 22     | 0         | 1-16           | 4              | CQQYNSYPLTF   | 11     | 0          | +    | +    |
| H47  | 3-30  | 7-27 | 3  | 4  | 1   | CARVANWGYMYFDYW         | 1   | 16     | 0         | 3-20           | 4              | CQQYGSSPLTF   | 11     | 0          | -    | +    |

|      | VH   | D    | RF | JH | (-) | CDR3(aa)              | (+) | Length | Mutations | V <sub>λ</sub> | J <sub>λ</sub> | CDR3(aa)      | Length | Mutations | Poly | Hep2 |
|------|------|------|----|----|-----|-----------------------|-----|--------|-----------|----------------|----------------|---------------|--------|-----------|------|------|
| H10* | 1-3  | 3-22 | 2  | 4  | 1   | CARVSANYDSSGYFFGHW    | 2   | 19     | 0         | 3-1            | 2              | CQAWDSSTVVF   | 11     | 0         | -    | +    |
| H21  | 1-46 | 4-17 | 4  | 2  | 7   | CAREIADDDYGDQEAGGLDYW | 1   | 21     | 0         | 2-23           | 1              | CCSYAGSSTYVF  | 12     | 0         | -    | -    |
| H38  | 3-11 | 2-15 | 3  | 4  | 1   | CARGTPRDYW            | 2   | 11     | 0         | 1-47           | 3              | CAAWDDSLSGWVF | 13     | 0         | -    | +    |
| H40  | 5-51 | 3-22 | 2  | 4  | 3   | CARQGYDSSGVDPFDYW     | 1   | 18     | 0         | 1-40           | 3              | CQSYDSSLRVF   | 11     | 0         | -    | -    |

RF : reading frame - : non-reactive + : reactive \* : kappa<sup>+</sup> and lambda<sup>+</sup> (dual receptor), both were expressed and tested on ELISA, but only one receptor was plotted on graphed figures FR : framework CDR : complementarity determining r : replacement mutation s : silent mutation

Sequence and reactivity tables for new emigrant B cells, (CD10+), from subject MG-MuSK-2

| Ig  | HEAVY |      |    |    |     | MG-MuSK-2, 10+              |     |        |           | LIGHT          |                |              |        | Reactivity |      |
|-----|-------|------|----|----|-----|-----------------------------|-----|--------|-----------|----------------|----------------|--------------|--------|------------|------|
|     | VH    | D    | RF | JH | (-) | CDR3(aa)                    | (+) | Length | Mutations | V <sub>k</sub> | J <sub>k</sub> | CDR3(aa)     | Length | Mutations  | Poly |
| H59 | 4-59  | 3-10 | 3  | 3  | 4   | CAREMTRFGELSGVSDAFDIW       | 2   | 21     | 1r FR3    | 1-5            | 1              | CQQYNSYSPWTF | 12     | 0          | -    |
| H62 | 1-2   | 5-24 | 3  | 4  | 2   | CARSDGYPRWGFYDW             | 2   | 15     | 0         | 3-15           | 3              | CQQYNNWLTF   | 10     | 0          | -    |
| H64 | 3-23  | 2-2  | 3  | 6  | 1   | CAKSLTKPSIKAVVPAAILYYYGMDVW | 3   | 28     | 0         | 1-39           | 1              | CQQSYSTLSWTF | 12     | 0          | +    |
| H65 | 1-18  | 6-19 | 1  | 2  | 1   | CARPNLGSGWSIYQPNWYFDLW      | 1   | 22     | 0         | 3-20           | 2              | CQQYGSSPPYTF | 12     | 0          | +    |
| H68 | 4-31  | 6-6  | 2  | 1  | 1   | CARNHFIAARPMAYFQHW          | 4   | 19     | 0         | 3-15           | 2              | CQQYNNWPSYTF | 12     | 0          | -    |
| H69 | 4-59  | 3-16 | 2  | 3  | 2   | CARARSDVWGSYRMKGAFDIW       | 4   | 21     | 0         | 2-28           | 4              | CMQALQTLTF   | 10     | 0          | +    |
| H74 | 3-30  | 3-3  | 2  | 6  | 3   | CAKEAPLYDFWGSYRSYYYYYMDVW   | 2   | 26     | 0         | 2-28           | 1              | CMQALQTPRTF  | 11     | 0          | +    |
| H77 | 3-30  | 5-5  | 3  | 4  | 1   | CAKGLGYNYGYPYFDYDW          | 1   | 18     | 0         | 3-15           | 3              | CQQYNNWPLTF  | 11     | 0          | -    |
| H80 | 4-34  | 3-22 | 2  | 6  | 2   | CARARVYTYYYDRIMDVW          | 3   | 18     | 0         | 1-5            | 2              | CQQYNSYPYTF  | 11     | 0          | -    |
| H81 | 3-33  | 3-10 | 1  | 6  | 3   | CARDLIRLWFGESGGYYYYYMDVW    | 2   | 26     | 0         | 2-28           | 1              | CMQALQTPTWTF | 12     | 0          | +    |
| H83 | 3-9   | 3-3  | 2  | 4  | 2   | CVKGGNPYYDFWSDHW            | 2   | 16     | 0         | 1-13           | 4              | CQQFNSYPLTF  | 11     | 0          | -    |
| H89 | 4-61  | 4-23 | 2  | 6  | 2   | CARDFQVGLRYYYYYMDVW         | 2   | 19     | 0         | 1-89           | 2              | CQQSYSTPYTF  | 11     | 0          | +    |
| H91 | 3-30  | 2-2  | 3  | 5  | 2   | CARDPNIVVRNWFDPW            | 2   | 17     | 0         | 3-20           | 2              | CQQYGSSPYTF  | 11     | 0          | +    |
| H95 | 3-21  | 6-13 | 1  | 3  | 1   | CARAGYSSSWYPWAFDIW          | 1   | 18     | 0         | 1-39           | 2              | CQQSYSTPPYTF | 12     | 0          | +    |

|     | VH   | D    | RF | JH | (-) | CDR3(aa)          | (+) | Length | Mutations | V <sub>λ</sub> | J <sub>λ</sub> | CDR3(aa)      | Length | Mutations | Poly |
|-----|------|------|----|----|-----|-------------------|-----|--------|-----------|----------------|----------------|---------------|--------|-----------|------|
| H96 | 3-30 | 3-22 | 3  | 5  | 3   | CAREVRMIVVEGWDFPW | 2   | 17     | 0         | 3-21           | 3              | CQVWDSSSDHWVF | 13     | 0         | -    |

RF : reading frame    - : non-reactive    + : reactive    \* : kappa<sup>+</sup> and lambda<sup>+</sup> (dual receptor), both were expressed and tested on ELISA, but only one receptor was plotted on graphed figures    FR : framework    CDR : complementarity determining    r : replacement mutation    s : silent mutation

Sequence and reactivity tables for mature naive B cells, (CD10-), from subject MG-MuSK-2

| Ig   | HEAVY |      |    |    |     | MG-MuSK-2, 10-           |     |        |           |                | LIGHT          |               |        |           |      | Reactivity |  |
|------|-------|------|----|----|-----|--------------------------|-----|--------|-----------|----------------|----------------|---------------|--------|-----------|------|------------|--|
|      | VH    | D    | RF | JH | (-) | CDR3(aa)                 | (+) | Length | Mutations | V <sub>κ</sub> | J <sub>κ</sub> | CDR3(aa)      | Length | Mutations | Poly | Hep2       |  |
| H3   | 4-39  | 3-9  | 2  | 5  | 2   | CARVPSYYDILTGYSQNWDFPW   | 1   | 22     | 0         | 1-5            | 2              | CQQYNSYLYTF   | 11     | 0         | +    | +          |  |
| H5   | 4-39  | 2-15 | 2  | 5  | 1   | CASPYCSGGSCYYGWDFPW      | 0   | 19     | 0         | 3-20           | 4              | CQQYGSSPPGLTF | 13     | 0         | -    | +          |  |
| H6   | 1-46  | 6-13 | 2  | 6  | 1   | CASSSSLNGPSDVW           | 0   | 14     | 0         | 3-15           | 1              | CQQYNNWPPWTF  | 12     | 0         | -    | +          |  |
| H7   | 4-39  | 4-17 |    | 4  | 3   | CARDYGDYVLGVYFDYW        | 1   | 18     | 0         | 1-5            | 1              | CQQYNSYSRTF   | 11     | 0         | -    | -          |  |
| H10  | 4-39  | 5-24 | 1  | 3  | 1   | CARRSRMATAGKAFDIW        | 0   | 17     | 0         | 1-5            | 4              | CQQYNSYLYTF   | 10     | 0         | +    | +          |  |
| H14  | 4-59  | 3-22 | 2  | 2  | 2   | CARAPTYYYDSSGYPRSYWYFDLW | 2   | 25     | 0         | 2-30           | 2              | CMQGTWPLYTF   | 12     | 0         | +    | +          |  |
| H23  | 4-61  | 1-7  | 3  | 3  | 4   | CAREGYNWNYRDQYDAFDIW     | 0   | 20     | 1r FR3    | 1-5            | 4              | CQQYNSYSIF    | 10     | 0         | -    | +          |  |
| H24  | 3-30  | 1-26 | 3  | 4  | 5   | CAREEYNWKYRDQYDAFDIW     | 3   | 20     | 0         | 3-11           | 4              | CQQRSNWPKTF   | 11     | 0         | -    | +          |  |
| H25  | 4-61  | 2-2  |    | 6  | 2   | CARGRLEPAAMHLNYYMDVW     | 3   | 20     | 1r FR3    | 1-5            | 4              | CQQYDRWGLTF   | 11     | 0         | +    | +          |  |
| H26  | 1-18  | 2-2  | 3  | 6  | 2   | CARDRGVVVPAAPLRGYYGMDVW  | 3   | 25     | 0         | 2-30           | 1              | CMQGTWHPRTF   | 11     | 0         | +    | +          |  |
| H29  | 3-23  | 4-23 | 2  | 4  | 3   | CAKDLTQGGEPYGPLDYW       | 1   | 18     | 0         | 3-20           | 1              | CQQYGSSPRTF   | 11     | 0         | -    | -          |  |
| H30  | 3-30  | 5-12 | 1  | 4  | 0   | CVLGVATMNW               | 0   | 10     | 0         | 1-5            | 1              | CQQYNSYWTF    | 10     | 0         | -    | +          |  |
| H38* | 1-46  | 4-75 | 2  | 6  | 5   | CARVRDDYGDYARPDSSYYMDVW  | 0   | 22     | 0         | 3-11           | 1              | CQQRSNWWTF    | 10     | 0         | -    | +          |  |
| H42  | 5-51  | 3-3  | 3  | 5  | 2   | CARGARGGEGWDFPW          | 2   | 15     | 0         | 3-15           | 2              | CQQYNNWPPMYTF | 13     | 0         | -    | +          |  |
| H43  | 3-48  | 3-22 | 2  | 4  | 4   | CARESSGYEGGPDYW          | 1   | 16     | 0         | 1-5            | 1              | CQQYNSYLWTF   | 11     | 0         | -    | -          |  |
| H44  | 1-18  | 6-13 | 2  | 5  | 1   | CARDDGIAAAGTGPW          | 0   | 15     | 0         | 1-39           | 4              | CQQSYSTLSLTF  | 12     | 0         | -    | -          |  |
| H46  | 1-2   | 3-10 | 2  | 6  | 7   | CAREYYYGSGSKVYYGMDVW     | 2   | 21     | 0         | 2-28           | 2              | CMQALQTPNTF   | 11     | 0         | -    | +          |  |

|      | VH   | D    | RF | JH | (-) | CDR3(aa)                | (+) | Length | Mutations | V <sub>λ</sub> | J <sub>λ</sub> | CDR3(aa)       | Length | Mutations | Poly | Hep2 |
|------|------|------|----|----|-----|-------------------------|-----|--------|-----------|----------------|----------------|----------------|--------|-----------|------|------|
| H15  | 4-39 | 3-9  | 3  | 4  | 2   | CARQGSVDYFDYW           | 1   | 13     | 0         | 4-1            | 2              | CQAWDSSSVVF    | 11     | 0         | -    | -    |
| H34  | 4-39 | 5-12 | 1  | 5  | 2   | CARKLVATNEAWDFPW        | 2   | 16     | 0         | 2-14           | 1              | CSSYTSSSTLEYVF | 14     | 1r CDR2   | -    | -    |
| H38* | 1-46 | 4-75 | 2  | 6  | 5   | CARVRDDYGDYARPDSSYYMDVW | 3   | 22     | 0         | 2-14           | 2              | CSSYTSSSTLVF   | 12     | 0         | -    | -    |

RF : reading frame - : non-reactive + : reactive \* : kappa<sup>+</sup> and lambda<sup>+</sup> (dual receptor), both were expressed and tested on ELISA, but only one receptor was plotted on graphed figures FR : framework CDR : complementarity determining r : replacement mutation s : silent mutation

Sequence and reactivity tables for new emigrant B cells, (CD10+), from subject HD-1

| Ig  | HEAVY |      |    |    |     | HD-1, 10+                  |     |        |               | LIGHT          |                |              |        |           | Reactivity |  |
|-----|-------|------|----|----|-----|----------------------------|-----|--------|---------------|----------------|----------------|--------------|--------|-----------|------------|--|
|     | VH    | D    | RF | JH | (-) | CDR3(aa)                   | (+) | Length | Mutations     | V <sub>κ</sub> | J <sub>κ</sub> | CDR3(aa)     | Length | Mutations | Poly       |  |
| H1  | 4-34  | 6-6  | 1  | 4  | 1   | CARFGGYSSSLFDYW            | 1   | 15     | 0             | 1-17           | 1              | CLQHNSYPRTF  | 11     | 0         | -          |  |
| H3  | 3-11  | 1-26 | 1  | 4  | 1   | CARGRRWENPGGYW             | 3   | 14     | 0             | 1-5            | 1              | CQQYNSYPWTF  | 11     | 0         | +          |  |
| H4  | 1-69  | 3-10 | 1  | 2  | 4   | CAREFSETREHRNWFYDLW        | 4   | 19     | 0             | 1-39           | 2              | CQQSYSTPPYTF | 12     | 0         | -          |  |
| H5  | 3-21  | 6-13 | 3  | 3  | 3   | CARDAAGGVAAAAYDAFDIW       | 1   | 20     | 0             | 1-39           | 5              | CQQSYSTPITF  | 11     | 0         | -          |  |
| H6  | 1-18  | 6-19 | 2  | 5  | 2   | CARESSSGWLMGWFDPW          | 1   | 17     | 0             | 3-20           | 1              | CQQYGSSLTWTF | 12     | 0         | -          |  |
| H7  | 4-39  | 4-17 | 3  | 5  | 2   | CARGFGEWHTVTTFPTNWFDPW     | 2   | 23     | 0             | 1-8            | 3              | CQQYYSYPPTF  | 11     | 0         | -          |  |
| H8  | 3-11  | 1-26 | 1  | 3  | 4   | CAREGAEWDLPAFDIW           | 1   | 17     | 0             | 3-15           | 1              | CQQYNNWPRTF  | 11     | 0         | -          |  |
| H9  | 4-31  | 2-2  | 2  | 5  | 0   | CARGSSTSCYWATW             | 1   | 14     | 0             | 4-1            | 4              | CQQYYSTPLTF  | 11     | 0         | -          |  |
| H10 | 3-72  | 4-11 | 3  | 6  | 1   | CARGMTTVTHPMDVW            | 1   | 15     | 0             | 2-28           | 1              | CMQALQTATF   | 10     | 0         | -          |  |
| H11 | 3-23  | 3-10 | 3  | 4  | 2   | CAKDLGKPGVDYW              | 2   | 13     | 0             | 1-17           | 3              | CLQHNSYPFTF  | 11     | 0         | -          |  |
| H12 | 3-30  | 6-19 | 3  | 4  | 3   | CARDGSRGDVAGTVGYFDYW       | 2   | 20     | 1r FR2/1r FR3 | 3-15           | 2              | CQQYNNWPPYSF | 12     | 0         | -          |  |
| H13 | 3-9   | 6-19 | 2  | 6  | 3   | CAKDILLSSDSSGWYYHRYYYGMDVW | 3   | 26     | 1r FR2        | 1-12           | 4              | CQQANSFPRVF  | 11     | 0         | -          |  |
| H14 | 3-15  | 3-3  | 2  | 5  | 3   | CTTDHSRDFWSAHRANWFDPW      | 4   | 21     | 0             | 1-27           | 4              | CQKYNSAPLTF  | 11     | 0         | +          |  |
| H15 | 3-30  | 4-11 | 2  | 6  | 3   | CAREFDYAYSNYHSYYYGMDVW     | 2   | 22     | 0             | 1-39           | 3              | CQQSYSTPFTF  | 11     | 0         | -          |  |
| H16 | 3-23  | 3-9  | 2  | 4  | 3   | CARGKRNDILTGSEFDYW         | 3   | 18     | 0             | 1-5            | 1              | CQQYNSYWTF   | 10     | 0         | -          |  |

|     | VH   | D    | RF | JH | (-) | CDR3(aa)                      | (+) | Length | Mutations | V <sub>λ</sub> | J <sub>λ</sub> | CDR3(aa)       | Length | Mutations | Poly |
|-----|------|------|----|----|-----|-------------------------------|-----|--------|-----------|----------------|----------------|----------------|--------|-----------|------|
| H2  | 3-13 | 3-22 | 2  | 6  | 1   | CARGVSSGYSGTYYYYGMDVW         | 1   | 22     | 0         | 1-51           | 3              | CGTWDSLSAGVF   | 13     | 0         | -    |
| H17 | 3-9  | 2-2  | 2  | 6  | 2   | CARDIRPRAGYCSSTSCYHHSYYYGMDVW | 5   | 30     | 0         | 1-40           | 1              | CQSYDSSLSGYVF  | 13     | 2r FR3    | -    |
| H18 | 3-21 | 3-22 | 2  | 4  | 3   | CARDYDSSGLGSPYDYW             | 1   | 17     | 1r CDR2   | 2-23           | 2              | CCSYAGSSTFGGVF | 14     | 0         | -    |

RF : reading frame - : non-reactive + : reactive \* : kappa<sup>+</sup> and lambda<sup>+</sup> (dual receptor), both were expressed and tested on ELISA, but only one receptor was plotted on graphed figures FR : framework CDR : complementarity determining r : replacement mutation s: silent mutation

Sequence and reactivity tables for mature naive B cells, (CD10-), from subject HD-1

| Ig  | HEAVY |      |    |    |     | HD-1, 10-                 |     |        |           | LIGHT          |                |               |        |           | Reactivity |      |
|-----|-------|------|----|----|-----|---------------------------|-----|--------|-----------|----------------|----------------|---------------|--------|-----------|------------|------|
|     | VH    | D    | RF | JH | (-) | CDR3(aa)                  | (+) | Length | Mutations | V <sub>κ</sub> | J <sub>κ</sub> | CDR3(aa)      | Length | Mutations | Poly       | Hep2 |
| H3  | 3-21  | 5-12 | 2  | 4  | 2   | CARDFGGYSGYDQGSYW         | 1   | 17     | 0         | 1-5            | 1              | CQQYNSYWTF    | 10     | 0         | -          | +    |
| H5  | 4-34  | 3-3  | 2  | 5  | 2   | CARGCYDFWGSVRFDPW         | 2   | 19     | 0         | 3-15           | 2              | CQQYNNWPPMYSF | 13     | 0         | +          | -    |
| H6  | 3-9   | 3-3  | 2  | 4  | 2   | CAKAIRSLSTNDFWSGRGYFDYW   | 3   | 24     | 0         | 3-11           | 4              | CQQRSNWPLTF   | 11     | 0         | -          | -    |
| H7  | 4-61  | 3-10 | 1  | 2  | 4   | CAREPNDLWFGELLPNHSYWYFDLW | 2   | 25     | 0         | 3-20           | 1              | CQQYGSSQRTF   | 11     | 0         | -          | +    |
| H8  | 3-7   | 3-22 | 2  | 4  | 2   | CAREYSSGYPLDYW            | 1   | 15     | 0         | 1-39           | 2              | CQQSYSTPYSF   | 11     | 0         | -          | -    |
| H10 | 3-9   | 3-10 | 2  | 4  | 3   | CAKDKDYASGTYPPYFDYW       | 2   | 20     | 0         | 3-11           | 4              | CQQRKGF       | 7      | 1r FR3    | -          | -    |
| H11 | 69-42 | 3-22 | 2  | 6  | 2   | CAGSRGRDSSGYYYGMDVW       | 2   | 21     | 0         | 3-15           | 1              | CQQYNNWPPTWTF | 13     | 0         | -          | -    |
| H12 | 3-48  | 2-2  | 3  | 6  | 3   | CARDQVVVPADLTYYYYGMDVW    | 1   | 24     | 0         | 2-28           | 2              | CMQALQTPYTF   | 11     | 0         | -          | -    |
| H13 | 4-61  | 4-11 | 2  | 3  | 4   | CARDLSYMGDAFDIW           | 1   | 16     | 0         | 3-15           | 1              | CQQYNNWPQTF   | 11     | 0         | -          | -    |
| H14 | 3-30  | 2-15 | 3  | 4  | 3   | CARDSATFDYW               | 1   | 12     | 0         | 1-39           | 1              | CQQSYSTPPTF   | 11     | 0         | -          | +    |
| H15 | 4-34  | 6-13 | 2  | 6  | 2   | CARDPAAGRYPGFYYYGMDVW     | 2   | 22     | 0         | 1-12           | 4              | CQQANSFPRTF   | 11     | 0         | -          | -    |
| H16 | 4-31  | 3-10 | 2  | 4  | 2   | CASRGDGVYDW               | 0   | 11     | 0         | 4-1            | 1              | CQQYYSTPWTF   | 11     | 0         | +          | -    |
| H17 | 3-33  | 3-22 | 2  | 3  | 3   | CARDRYYYDSSGYVKSAFDIW     | 3   | 24     | 0         | 1-33           | 2              | CQQYDNLYSF    | 10     | 0         | -          | -    |

|     | VH   | D    | RF | JH | (-) | CDR3(aa)                | (+) | Length | Mutations | V <sub>λ</sub> | J <sub>λ</sub> | CDR3(aa)      | Length | Mutations | Poly | Hep2 |
|-----|------|------|----|----|-----|-------------------------|-----|--------|-----------|----------------|----------------|---------------|--------|-----------|------|------|
| H1  | 3-9  | 2-15 | 2  | 6  | 2   | CAKDSGCGGSCYSSYYYYYGMVW | 1   | 25     | 0         | 3-21           | 2              | CQVWDSSSHVVVF | 13     | 0         | -    | -    |
| H2  | 3-9  | 3-22 | 2  | 4  | 5   | CAKDGAEGYDSSGFDYFDYW    | 1   | 22     | 0         | 3-21           | 2              | CQVWDSSSHVVVF | 13     | 0         | -    | -    |
| H4  | 3-74 | 6-13 | 2  | 6  | 2   | CARDVGAYSSWYYYGMDVW     | 1   | 21     | 0         | 3-25           | 2              | CQSADSSGTYYVF | 13     | 0         | -    | -    |
| H9  | 1-3  | 6-19 | 3  | 6  | 2   | CAREAIAVAGSYSSYYYGMDVW  | 1   | 22     | 0         | 3-21           | 3              | CQVWDSSSHVVVF | 13     | 0         | -    | -    |
| H18 | 3-21 | 1-26 | 2  | 4  | 1   | CARGRSYGSYYGRDYW        | 3   | 17     | 0         | 3-21           | 1              | CQVWDSSSHVVVF | 13     | 0         | -    | -    |
| H19 | 4-31 | 5-24 | 2  | 4  | 2   | CARGPPIRDGYNPYFDYW      | 2   | 18     | 0         | 2-14           | 3              | CSSYTSSTLWVF  | 13     | 0         | -    | -    |
| H20 | 4-34 | 3-10 | 2  | 4  | 1   | CARAGSGSYFDYW           | 1   | 15     | 0         | 2-23           | 2              | CCSYAGSSTWVF  | 12     | 0         | -    | +    |
| H21 | 3-48 | 3-22 | 2  | 6  | 3   | CARDYYDSSGYRHYGMDVW     | 3   | 19     | 0         | 2-14           | 2              | CSSYTSSTLVVF  | 13     | 1r CDR2   | -    | -    |

RF : reading frame - : non-reactive + : reactive \* : kappa<sup>+</sup> and lambda<sup>+</sup> (dual receptor), both were expressed and tested on ELISA, but only one receptor was plotted on graphed figures FR : framework CDR : complementarity determining r : replacement mutation s : silent mutation

Sequence and reactivity tables for new emigrant B cells, (CD10+), from subject HD-2

| Ig  | HEAVY |      |    |    |     | HD-2, 10+                    |     |        |           | LIGHT |    |               |        |           | Reactivity |
|-----|-------|------|----|----|-----|------------------------------|-----|--------|-----------|-------|----|---------------|--------|-----------|------------|
|     | VH    | D    | RF | JH | (-) | CDR3(aa)                     | (+) | Length | Mutations | Vκ    | Jκ | CDR3(aa)      | Length | Mutations | Poly       |
| H1  | 3-21  | 7-27 | 3  | 4  | 1   | CARNWGFGRGANDYW              | 2   | 17     | 0         | 3-20  | 2  | CQQYGSSPETF   | 11     | 0         | +          |
| H4  | 3-43  | 2-15 | 2  | 5  | 2   | CAREVYCSGGSCYTGWFDPW         | 1   | 20     | 0         | 3-20  | 2  | CQQYGSSPPYTF  | 12     | 0         | -          |
| H5  | 3-21  | 5-12 | 1  | 4  | 3   | CARDMEATIRNFDYW              | 2   | 15     | 0         | 3-11  | 4  | CQQRSNWPRELTF | 14     | 0         | -          |
| H7  | 3-21  | 3-16 | 2  | 5  | 1   | CARTKGLGWFDPW                | 2   | 13     | 0         | 1-16  | 1  | CQQYNSYPPTF   | 11     | 0         | -          |
| H11 | 1-18  | 3-9  | 2  | 6  | 2   | CARGYDILTGSGLYYYYYYMDVW      | 1   | 24     | 0         | 2-28  | 4  | CMQALQTRSF    | 10     | 0         | -          |
| H12 | 3-53  | 2-15 | 2  | 6  | 3   | CARDRVLVDGYCSGGSCYGGYYYYMDVW | 2   | 28     | 0         | 3-20  | 1  | CQQYGSSPGWTF  | 12     | 0         | -          |
| H13 | 4-39  | 1-26 | 3  | 4  | 1   | CARLGYSGSYHLPYYFDYW          | 2   | 19     | 0         | 1-5   | 2  | CQQYNSYSTF    | 10     | 0         | -          |

|     | VH   | D    | RF | JH | (-) | CDR3(aa)              | (+) | Length | Mutations | Vλ   | Jλ | CDR3(aa)        | Length | Mutations | Poly |
|-----|------|------|----|----|-----|-----------------------|-----|--------|-----------|------|----|-----------------|--------|-----------|------|
| H2  | 3-73 | 4-17 | 2  | 4  | 2   | CTRLWVPYGDYAVDYW      | 1   | 16     | 0         | 1-44 | 3  | CAAWDDSLNGWVF   | 13     | 0         | -    |
| H3  | 3-23 | 2-2  | 2  | 4  | 2   | CAKFEGYCSSTSCYPGFYDW  | 1   | 20     | 0         | 3-25 | 2  | CQSADSSGTYVVF   | 13     | 0         | -    |
| H6  | 3-73 | 2-15 | 2  | 4  | 2   | CALRSECSGGSCYSFSNDYW  | 2   | 20     | 0         | 3-25 | 1  | CQSADSSGTYVVF   | 12     | 0         | -    |
| H8  | 5-51 | 6-13 | 2  | 6  | 1   | CARHLGLAAAGYYYYYYMDVW | 2   | 20     | 0         | 1-47 | 2  | CAAWDDSLSGVVF   | 13     | 0         | -    |
| H9  | 4-4  | 5-12 | 1  | 4  | 1   | CARVDIVATGAFYW        | 1   | 14     | 0         | 2-11 | 1  | CCSYAGSYVF      | 10     | 0         | -    |
| H10 | 3-74 | 5-12 | 3  | 4  | 2   | CARARGYSGYDVDYDW      | 2   | 15     | 0         | 1-44 | 2  | CAAWDDSLNGPRVVF | 15     | 0         | -    |
| H14 | 5-51 | 6-19 | 1  | 5  | 1   | CARAYSSGWYTNWFDPW     | 1   | 17     | 0         | 1-51 | 2  | CGTWDDSLSAHVVF  | 14     | 0         | -    |
| H15 | 4-31 | 2-2  | 2  | 2  | 3   | CARDTGYCSSTSCDWYFDLW  | 1   | 20     | 0         | 2-14 | 3  | CSSYTSSTLVF     | 12     | 0         | -    |

RF : reading frame - : non-reactive + : reactive \* : kappa<sup>+</sup> and lambda<sup>+</sup> (dual receptor), both were expressed and tested on ELISA, but only one receptor was plotted on graphed figures FR : framework CDR : complementarity determining r : replacement mutation s : silent mutation

Sequence and reactivity tables for mature naive B cells, (CD10-), from subject HD-2

| Ig  | HEAVY |      |    |    |     | HD-2, 10-                    |     |        |           | LIGHT |    |               |        | Reactivity |      |      |
|-----|-------|------|----|----|-----|------------------------------|-----|--------|-----------|-------|----|---------------|--------|------------|------|------|
|     | VH    | D    | RF | JH | (-) | CDR3(aa)                     | (+) | Length | Mutations | Vκ    | Jκ | CDR3(aa)      | Length | Mutations  | Poly | Hep2 |
| H2  | 1-69  | 3-10 | 2  | 3  | 3   | CARVGIFKAETPGGSGSYNSESFAFDIW | 2   | 29     | 0         | 4-1   | 1  | CQQNNWPWTF    | 10     | 0          | -    | -    |
| H7  | 1-46  | 3-22 | 2  | 4  | 3   | CARGRYYYDSSAADGEYW           | 2   | 18     | 0         | 3-11  | 4  | CQQRSNWPRELTF | 13     | 0          | -    | -    |
| H11 | 3-23  | 2-2  | 3  | 4  | 1   | CAKELRIIVVPAAYTRYW           | 3   | 19     | 0         | 1-39  | 1  | CQQSYSTRWTF   | 11     | 0          | +    | +    |
| H12 | 3-23  | 1-24 | 1  | 6  | 3   | CAEPEGDFDYW                  | 1   | 11     | 0         | 3-15  | 1  | CQQYNNWPRWTF  | 12     | 1r FR3     | -    | -    |

|     | VH   | D    | RF   | JH | (-) | CDR3(aa)                   | (+)                | Length | Mutations | Vλ   | Jλ   | CDR3(aa)        | Length          | Mutations | Poly | Hep2 |
|-----|------|------|------|----|-----|----------------------------|--------------------|--------|-----------|------|------|-----------------|-----------------|-----------|------|------|
|     | H1   | 4-39 | 6-19 | 3  | 4   | 3                          | CARQEQWLVGGEYYFDYW | 1      | 18        | 0    | 1-47 | 3               | CAAWDDSLSGRNWVF | 15        | 0    | -    |
| H3  | 3-74 | 3-3  | 2    | 4  | 3   | CARDDFWSGYLYYFDYW          | 1                  | 17     | 0         | 8-61 | 2    | CVLYMGSGIWVF    | 12              | 0         | -    | -    |
| H4  | 3-73 | 2-8  | 2    | 6  | 1   | CTRGMRYSTTYMDVW            | 2                  | 16     | 0         | 1-47 | 3    | CAAWDDSLSGWVF   | 13              | 0         | -    | -    |
| H5  | 5-51 | 3-9  | 2    | 4  | 2   | CARLPPHYDILTGGYRKGFDYW     | 4                  | 22     | 0         | 3-21 | 2    | CQVWSSSDPVF     | 12              | 0         | -    | -    |
| H6  | 3-9  | 4-17 | 2    | 6  | 3   | CAKSPGDYDYMDVW             | 1                  | 14     | 0         | 3-21 | 2    | CQVWSSSDVVF     | 12              | 0         | -    | -    |
| H8  | 3-48 | 6-19 | 2    | 6  | 2   | CARQPAPQYSSGWYYDYDYYY-MDVW | 1                  | 25     | 0         | 1-40 | 2    | CQSYDSSLGSGNVVF | 15              | 0         | -    | +    |
| H10 | 4-4  | 5-5  | 2    | 3  | 3   | CAREGRYGGPVDAFDIW          | 2                  | 17     | 0         | 1-51 | 2    | CGTWSSLSAVVF    | 13              | 0         | -    | +    |

RF : reading frame    - : non-reactive    + : reactive    \* : kappa<sup>+</sup> and lambda<sup>+</sup> (dual receptor), both were expressed and tested on ELISA, but only one receptor was plotted on graphed figures    FR : framework    CDR : complementarity determining    r : replacement mutation    s: silent mutation
